# Supplementary material for: Glossogyne tenuifolia (Hsiang-ju) extract suppresses T cell activation by inhibiting activation of c-Jun N-terminal kinase
Source: Springer Nature journal article supplement (doi:10.1186/s13020-017-0130-4), 2017-04-11
Supplement: MOESM2 [file 12213052]

# 義守大學動物實驗管理小組審查同意書

## Affidavit of Approval of Animal Use Protocol

### I-Shou University

計畫書編號(IACUC Protocol No): AUP-96-43-007

同意書編號(Approval No): IACUC-ISU-96002

計畫書申請人: 方麗雯 職稱: 助理教授  
單位: 醫學營養學系 飼養及應用地點: 實驗動物中心  
計畫名稱: 香菇有效成分對輔助抗癌及免疫活性調控機制之探討

本「動物實驗計畫書」業經動物實驗管理小組  實質  形式審查通過。本計畫預定飼養應用之動物如下:

| <u>動物種類</u>     | <u>動物數量</u> | <u>飼養及應用期間</u> 3                |
|-----------------|-------------|---------------------------------|
| Foxnlnu/Foxnlnu | 100 隻       | 2008 年 8 月 1 日至 2011 年 7 月 31 日 |
| mice/Balb/c     | 100 隻       | 2008 年 8 月 1 日至 2011 年 7 月 31 日 |

The animal use protocol listed below has been reviewed and approved by the Institutional Animal Care and Use Committee (IACUC)

Protocol Title: Study on the mechanisms of *Glossogyne tenuifolia* (L.) Decne on accessory anticancer and immunoregulation

Protocol No: \_\_\_\_\_

Period of Protocol: Valid From: 08/01/2008 To: 07/31/2011

Principle Investigator (PI): Li-Wen Fang

動物實驗管理小組召集人:

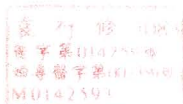

日期: 961224

IACUC Chairman:

Date:
