# Supplementary material for: Glossogyne tenuifolia (Hsiang-ju) extract suppresses T cell activation by inhibiting activation of c-Jun N-terminal kinase
Source: Springer Nature journal article supplement (doi:10.1186/s13020-017-0130-4), 2017-04-11

| GTE ( $\mu\text{g/mL}$ ) |         | 0                        | 3.13                    | 6.3                     | 12.5                    | 25                    | 50                    |
|--------------------------|---------|--------------------------|-------------------------|-------------------------|-------------------------|-----------------------|-----------------------|
| Donor 1                  | Control | 944.3 $\pm$<br>169.7     | 977 $\pm$<br>3.5        | 1046.3 $\pm$<br>229.1   | 911 $\pm$<br>181.7      | 688 $\pm$<br>80.6     | 492.8 $\pm$<br>91.2   |
|                          | PHA     | 45846.3 $\pm$<br>2899.1  | 39669 $\pm$<br>554.4    | 34967 $\pm$<br>2350.4   | 26289.7 $\pm$<br>907.2  | 8107.3 $\pm$<br>359.2 | 829 $\pm$<br>529.6    |
| Donor 2                  | Control | 420.3 $\pm$<br>57.3      | 388.7 $\pm$<br>96.9     | 466 $\pm$<br>89.1       | 407.3 $\pm$<br>89.8     | 263 $\pm$<br>113.8    | 249 $\pm$<br>120.9    |
|                          | PHA     | 56682 $\pm$<br>200.8     | 42780 $\pm$<br>2013.1   | 37749 $\pm$<br>6284.8   | 29339.3 $\pm$<br>2066.2 | 9615 $\pm$<br>376.2   | 507.3 $\pm$<br>9.9    |
| Donor 3                  | Control | 451 $\pm$<br>93.3        | 415 $\pm$<br>42.4       | 445.3 $\pm$<br>180.3    | 379.7 $\pm$<br>66.5     | 265 $\pm$<br>101.8    | 142 $\pm$<br>38.2     |
|                          | PHA     | 111474.3 $\pm$<br>5941.1 | 103375 $\pm$<br>2404.8  | 91925.7 $\pm$<br>7929.5 | 73191 $\pm$<br>1954.4   | 32241 $\pm$<br>2735.8 | 1244.3 $\pm$<br>169.7 |
| Donor 4                  | Control | 1874 $\pm$<br>952.5      | 1097.7 $\pm$<br>157.7   | 1190 $\pm$<br>246.1     | 773 $\pm$<br>147.8      | 854 $\pm$<br>101.1    | 545 $\pm$<br>155.6    |
|                          | PHA     | 68121 $\pm$<br>299.1     | 61512.3 $\pm$<br>1844.8 | 56309 $\pm$<br>2728.7   | 45475.7 $\pm$<br>1784.0 | 35311 $\pm$<br>5321.7 | 13252 $\pm$<br>400.2  |

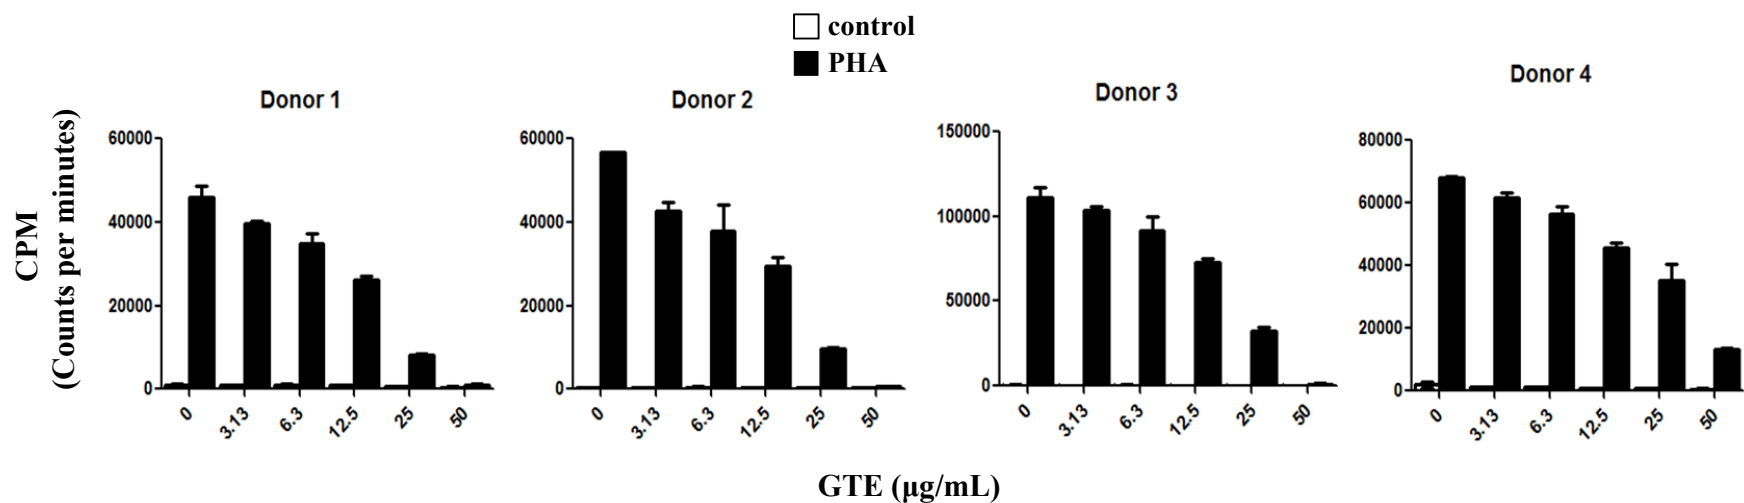

Supplement: MOESM4 [file 12213052]
